# Supplementary material for: Modeling Sexual Differences of Body Size Variation in Ground Beetles in Geographical Gradients: A Case Study of Pterostichus melanarius (Illiger, 1798) (Coleoptera, Carabidae)
Source: MDPI journal article supplement (doi:10.3390/life12010112), 2022-01-13
Supplement: s1 [file s1]

## Figures S

- S1 – Elytra width variation in latitude gradient in *P. melanarius*
- S2 – Pronotum length variation in latitude gradient in *P. melanarius*
- S3 – Pronotum width variation in latitude gradient in *P. melanarius*
- S4 – Head length variation in latitude gradient in *P. melanarius*
- S5 – Distance between eyes variation in latitude gradient in *P. melanarius*
- S6 – Elytra width variation in longitude gradient in *P. melanarius*
- S7 – Pronotum length variation in longitude gradient in *P. melanarius*
- S8 – Pronotum width variation in longitude gradient in *P. melanarius*
- S9 – Head length variation in longitude gradient in *P. melanarius*
- S10 – Distance between eyes variation in longitude gradient in *P. melanarius*
- S11 – Regression slopes of elytra width variation in latitude gradient in *P. melanarius*
- S12 – Regression slopes of pronotum length variation in latitude gradient in *P. melanarius*
- S13 – Regression slopes of pronotum width variation in latitude gradient in *P. melanarius*
- S14 – Regression slopes of head length variation in latitude gradient in *P. melanarius*
- S15 – Regression slopes of distance between eyes variation in latitude gradient in *P. melanarius*
- S16 – Regression slopes of elytra width variation in longitude gradient in *P. melanarius*
- S17 – Regression slopes of pronotum length variation in longitude gradient in *P. melanarius*
- S18 – Regression slopes of pronotum width variation in longitude gradient in *P. melanarius*
- S19 – Regression slopes of head length variation in longitude gradient in *P. melanarius*
- S20 – Regression slopes of distance between eyes variation in longitude gradient in *P. melanarius*
