# Supplementary material for: Modeling Sexual Differences of Body Size Variation in Ground Beetles in Geographical Gradients: A Case Study of Pterostichus melanarius (Illiger, 1798) (Coleoptera, Carabidae)
Source: MDPI journal article supplement (doi:10.3390/life12010112), 2022-01-13
Supplement: s1 [file s1]

**Table S1.** Regression results in latitude elytra width variation in *P. melanarius*.

|              | Estimate | Std. Error | t value | Pr(> t ) |     |
|--------------|----------|------------|---------|----------|-----|
| (Intercept)  | 5.2518   | 0.1990     | 26.379  | < 2e-16  | *** |
| fSexMale     | -0.0757  | 0.2703     | -0.280  | 0.779    |     |
| Lat          | -0.0339  | 0.0036     | -9.400  | < 2e-16  | *** |
| fSexMale:Lat | 0.0029   | 0.0049     | 0.606   | 0.544    |     |

Notes. fSexMale – how males differed in trait size from females (here we see that they were smaller); Lat – significance of regression coefficient in females (latitude really affected trait size in positive direction); fSexMale:Lat – difference in regression coefficients between males and females (it was insignificant); \*\*\*– p-level<0.001.

**Table S2.** Regression results in latitude pronotum length variation in *P. melanarius*.

|              | Estimate | Std. Error | t value | Pr(> t ) |     |
|--------------|----------|------------|---------|----------|-----|
| (Intercept)  | 3.3079   | 0.086      | 38.430  | < 2e-16  | *** |
| fSexMale     | -0.8671  | 0.1198     | -7.233  | 5.27e-13 | *** |
| Lat          | 0.0004   | 0.0015     | 0.316   | 0.752    |     |
| fSexMale:Lat | 0.0123   | 0.0021     | 5.622   | 1.97e-08 | *** |

Notes. The same as in the Table S1.

**Table S3.** Regression results in latitude pronotum width variation in *P. melanarius*.

|              | Estimate | Std. Error | t value | Pr(> t ) |     |
|--------------|----------|------------|---------|----------|-----|
| (Intercept)  | 3.1597   | 0.1071     | 29.481  | < 2e-16  | *** |
| fSexMale     | -0.6717  | 0.1492     | -4.500  | 6.93e-06 | *** |
| Lat          | 0.0069   | 0.0019     | 3.556   | 0.0003   | *** |
| fSexMale:Lat | 0.0075   | 0.0027     | 2.742   | 0.0061   | **  |

Notes. The same as in the Table S1; \*\*– p-level<0.01.

**Table S4.** Regression results in latitude head length variation in *P. melanarius*.

|              | Estimate | Std. Error | t value | Pr(> t ) |     |
|--------------|----------|------------|---------|----------|-----|
| (Intercept)  | 7.8025   | 0.1351     | 57.728  | < 2e-16  | *** |
| fSexMale     | -0.3897  | 0.1882     | -2.070  | 0.0385   | *   |
| Lat          | -0.0953  | 0.0024     | -38.744 | <2e-16   | *** |
| fSexMale:Lat | 0.0043   | 0.0034     | 1.249   | 0.2119   |     |

Notes. The same as in the Table S1; \*– p-level<0.05.

**Table S5.** Regression results in latitude distance between eyes variation in *P. melanarius*.

|              | Estimate | Std. Error | t value | Pr(> t ) |     |
|--------------|----------|------------|---------|----------|-----|
| (Intercept)  | 2.5991   | 0.0751     | 34.568  | < 2e-16  | *** |
| fSexMale     | -0.1283  | 0.102      | -1.257  | 0.209    |     |
| Lat          | -0.0057  | 0.0013     | -4.191  | 2.82e-05 | *** |
| fSexMale:Lat | -0.001   | 0.0018     | -0.587  | 0.558    |     |

Notes. The same as in the Table S1.

**Table S6.** Regression results in longitude elytra width variation in *P. melanarius*.

|              | Estimate   | Std. Error | t value | Pr(> t ) |     |
|--------------|------------|------------|---------|----------|-----|
| (Intercept)  | 3.380e+00  | 3.068e-02  | 110.168 | < 2e-16  | *** |
| fSexMale     | 2.094e-01  | 4.188e-02  | 5.000   | 5.88e-07 | *** |
| Lon          | 7.459e-05  | 5.903e-04  | 0.126   | 0.8995   |     |
| fSexMale:Lon | -1.983e-03 | 8.191e-04  | -2.421  | 0.0155   | *   |

Notes. The same as in the Table S1; \*– p-level<0.05.

**Table S7.** Regression results in longitude pronotum length variation in *P. melanarius*.

|              | Estimate | Std. Error | t value | Pr(> t ) |     |
|--------------|----------|------------|---------|----------|-----|
| (Intercept)  | 3.3418   | 0.0134     | 248.514 | < 2e-16  | *** |
| fSexMale     | -0.2561  | 0.0186     | -13.744 | < 2e-16  | *** |
| Lon          | -0.0001  | 0.0002     | -0.546  | 0.5847   |     |
| fSexMale:Lon | 0.0012   | 0.0003     | 3.445   | 0.0005   | *** |

Notes. The same as in the Table S1.

**Table S8.** Regression results in longitude pronotum width variation in *P. melanarius*.

|              | Estimate | Std. Error | t value | Pr(> t ) |     |
|--------------|----------|------------|---------|----------|-----|
| (Intercept)  | 3.4601   | 0.0166     | 207.621 | < 2e-16  | *** |
| fSexMale     | -0.2942  | 0.023      | -12.739 | < 2e-16  | *** |
| Lon          | 0.0017   | 0.0003     | 5.221   | 1.84e-07 | *** |
| fSexMale:Lon | 0.0006   | 0.0004     | 1.401   | 0.161    |     |

Notes. The same as in the Table S1.

**Table S9.** Regression results in longitude head length variation in *P. melanarius*.

|              | Estimate | Std. Error | t value | Pr(> t ) |     |
|--------------|----------|------------|---------|----------|-----|
| (Intercept)  | 3.0522   | 0.0235     | 129.812 | < 2e-16  | *** |
| fSexMale     | -0.1     | 0.0325     | -3.071  | 0.0021   | **  |
| Lon          | -0.0101  | 0.0004     | -22.046 | < 2e-16  | *** |
| fSexMale:Lon | -0.0002  | 0.0006     | -0.418  | 0.6756   |     |

Notes. The same as in the Table S1; \*\*– p-level<0.01.

**Table S10.** Regression results in longitude distance between eyes variation in *P. melanarius*.

|              | Estimate   | Std. Error | t value | Pr(> t ) |     |
|--------------|------------|------------|---------|----------|-----|
| (Intercept)  | 2.330e+00  | 1.145e-02  | 203.511 | < 2e-16  | *** |
| fSexMale     | -1.837e-01 | 1.563e-02  | -11.755 | < 2e-16  | *** |
| Lon          | -9.462e-04 | 2.203e-04  | -4.295  | 1.77e-05 | *** |
| fSexMale:Lon | -3.836e-05 | 3.056e-04  | -0.126  | 0.9      |     |

Notes. The same as in the Table S1.
